# Supplementary material for: Preparation of polymer decorated graphene oxide by γ-ray induced graft polymerization
Source: Royal Society of Chemistry journal article supplement (doi:10.1039/c2nr11724j), 2012-01-01
Supplement: c2nr11724j.pdf [file c2nr11724j.pdf]

# Supporting Information

## Preparation of Polymer decorated Graphene Oxide by $\gamma$ -Ray Induced Graft Polymerization

Bowu ZHANG,<sup>a, b</sup> Yujie ZHANG,<sup>c</sup> Cheng PENG,<sup>a</sup> Ming YU,<sup>a</sup> Linfan LI,<sup>a</sup> Bo DENG,<sup>a</sup> Pengfei HU,<sup>d</sup> Chunhai FAN,<sup>a</sup> Jingye LI\*<sup>a</sup> and Qing HUANG\*<sup>a</sup>

<sup>a</sup> Shanghai Institute of Applied Physics, Chinese Academy of Sciences, No. 2019, Jialuo Road, Jiading District, Shanghai 201800, China. Fax. & Tel. [+86-21-3919-4505](tel:+86-21-3919-4505); E-mail [jingyeli@sinap.ac.cn](mailto:jingyeli@sinap.ac.cn); [huangqing@sinap.ac.cn](mailto:huangqing@sinap.ac.cn).

<sup>b</sup> Graduate University of the Chinese Academy of Sciences, No. 19A Yuquan Road, Shijingshan District, Beijing 100049, China

<sup>c</sup> Ningbo Institute of Material Technology & Engineering, Chinese Academy of Sciences, No. 519 Zhuangshi Road, Zhenhai District, Ningbo 315201, China

<sup>d</sup> Laboratory for Microstructures, Shanghai University, NO.99 Shangda Road, Baoshan District., Shanghai 200444, China

### Experimental section

#### The hydrolysis of GO-g-PVAc

GO-g-PVAc (20 mg) was dispensed in 20 mL methanol by sonication for 30 minutes, and then 0.2 mL 25 wt% NaOH methanol solutions was added and stirred at room temperature for 24 hours. After that, excessive water was added into the solution. Then the mixture was filtrated with 0.22 $\mu$ m acetyl cellulose membrane and the GO-g-PVA was obtained by removal of acetyl cellulose membrane and dried in vacuum oven at 60 °C overnight.

### Caption of Figure and Table:

Figure S1 XPS C1s spectra of (a) GO-g-PVA and (d)  $\gamma$ -ray irradiated GO; O1s spectra of (b) GO and (d) GO-g-PVAc.

Figure. S2 Photos of the dispersion of  $\gamma$ -ray irradiated GO in various organic solvents. The pictures were taken 1 hour after preparation.

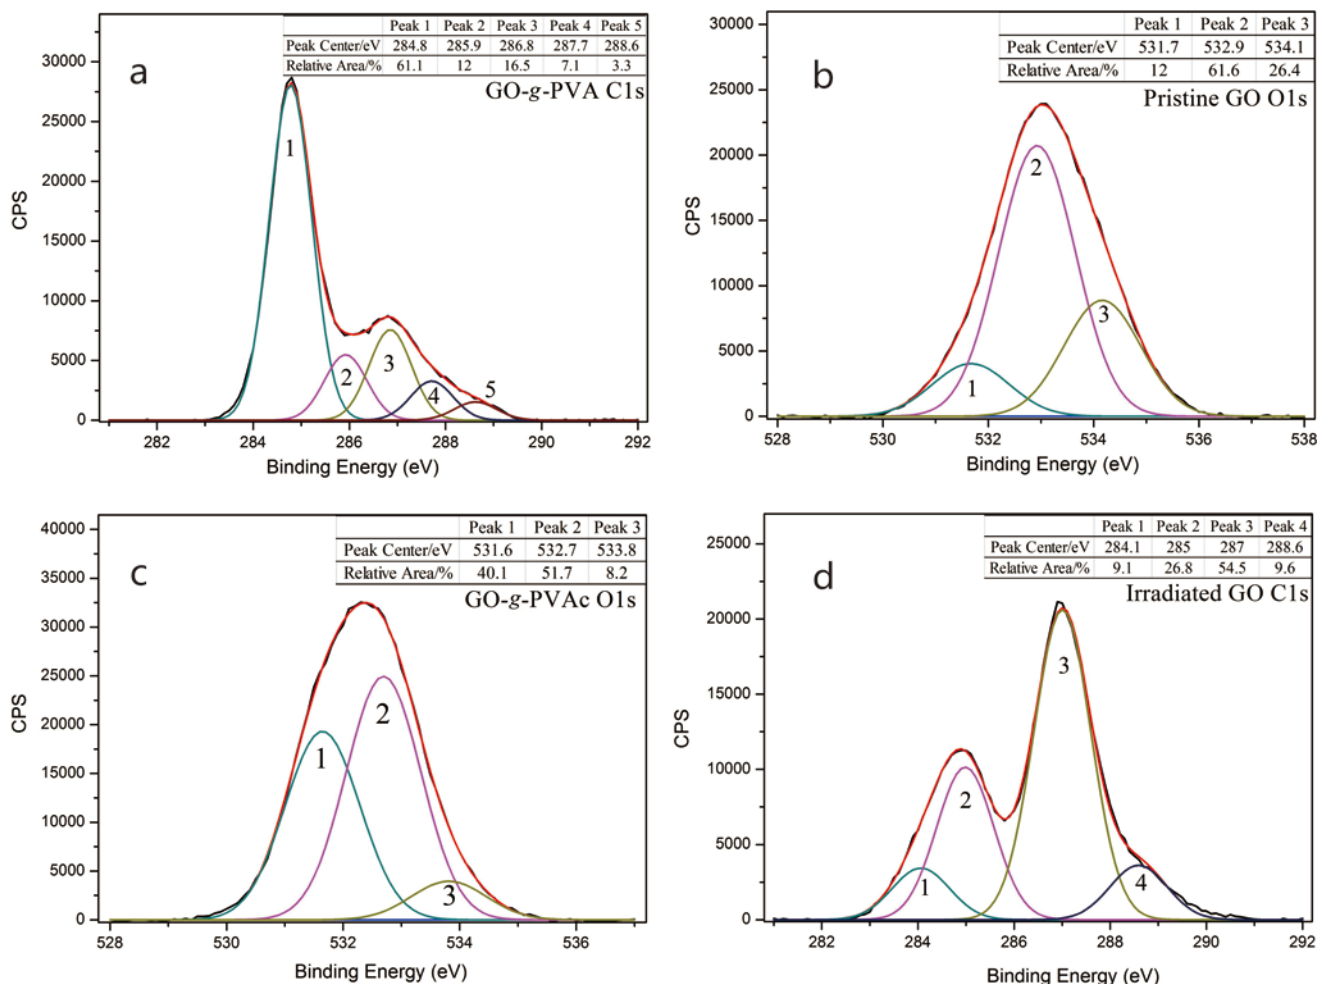

**Figure S1**

**Figure S1a** shows the **relative area** of C=O peak at 288.6 eV is decreased to 3.3, which is similar to that of GO, and the peak at 286.8 eV also decreased by comparing with that **GO-g-PVAc**, when **GO-g-PVAc** is hydrolyzed. These results demonstrate the grafted PVAc chain is almost complete hydrolysis.

**Figure S1b&c** show three Gaussian peaks at 531.6 eV (C=O group), 532.8 eV (C-OH/C-O) and 534.1 eV (H<sub>2</sub>O) in both GO and **GO-g-PVAc** samples. After the grafted PVAc onto GO, the intensity of C=O group (531.6 eV) is increased obviously, and the H<sub>2</sub>O peak decreased, which would indicated the replacement of water by PVAc chains in the interlayers.

**Figure S1d** shows the peak of graphite Carbon is extremely weaken and a very strong peak at 285 eV is appeared, which can be assigned to the peak of C-H. Additionally, the intensity of C-O/epoxy (287 eV) and carbonyl groups (288.8 eV) are also increased obviously. That is mean GO has reacted with the radiolysis products (i.e.,  $\cdot C_2H_5$ ,  $CH_3COO\cdot$  and  $\cdot CH_2COOC_2H_5$ ).

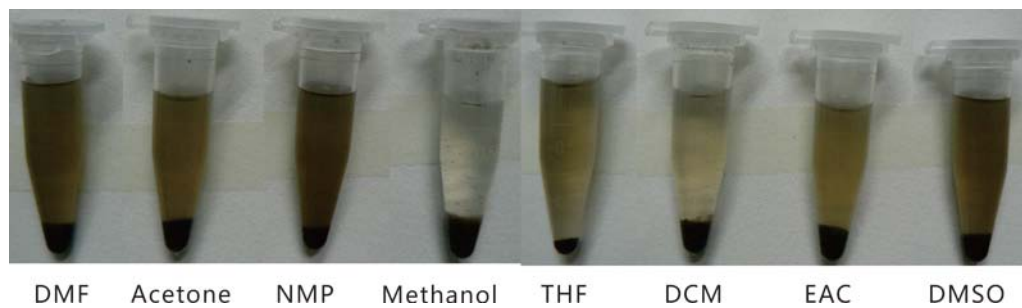

**Figure S2**

**Figure S2** shows that the GO irradiated in pure EAc by  $\gamma$ -ray cannot form stable dispersion in the common organic solvents.
